# Supplementary material for: Long-Term Iron Deficiency and Dietary Iron Excess Exacerbate Acute Dextran Sodium Sulphate-Induced Colitis and Are Associated with Significant Dysbiosis
Source: Int J Mol Sci. 2021 Mar 31;22(7):3646. doi: 10.3390/ijms22073646 (PMC8037348; doi:10.3390/ijms22073646)

Long-term iron deficiency and dietary iron excess exacerbate acute dextran sodium sulphate-induced colitis and are associated with significant dysbiosis

Mahalhal A, Burkitt MD, Duckworth CA, Hold GL, Campbell BJ, Pritchard DM and Probert CS

Supplementary Information

Figure S1: Schematic illustration of chronic DSS and control groups and the later subdivision at day 53 to start acute DSS colitis experiment.

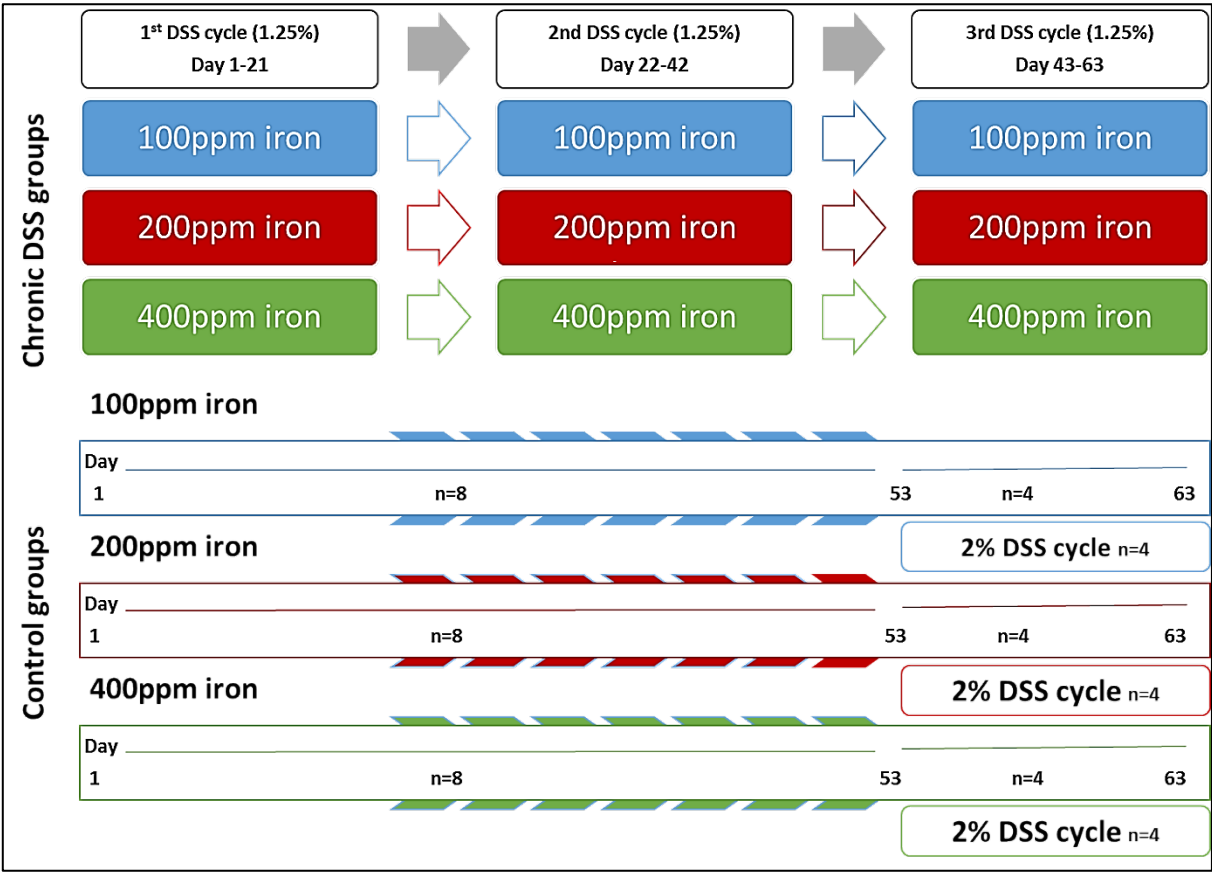

## Long-term iron deficiency and dietary iron excess exacerbate acute dextran sodium sulphate-induced colitis and are associated with significant dysbiosis

Mahalhal A, Burkitt MD, Duckworth CA, Hold GL, Campbell BJ, Pritchard DM and Probert CS

**Figure S2: Percentage change in body weight in female C57BL/6 mice consuming diets differing in levels of iron over 63 day.**

Mice were fed CRM (P) Rat and Mouse Breeder and Grower 10mm compression pellets which contained low iron (100 parts per million (ppm) [blue]), standard levels of iron (200ppm [red]) and supplemented levels of iron (400ppm [green]) over a 63-day study period. Data are presented as a mean  $\pm$  standard error of the mean; [n=8 mice per group (up to day 53), then n=4 (from day 53 to day 63)]. Data were assessed by the Kruskal-Wallis test followed by Dunn's multiple comparisons of treatments comparing day (time point) individually. Statistical differences observed  $^{*,\nabla}p<0.05$ ,  $^{***,\nabla\nabla\nabla}p<0.001$ ,  $^{****,\nabla\nabla\nabla\nabla}p<0.0001$ , comparing the 100ppm ( $^{\nabla}$ ) & 400 ppm ( $^*$ ) iron groups versus standard 200ppm iron group, respectively.

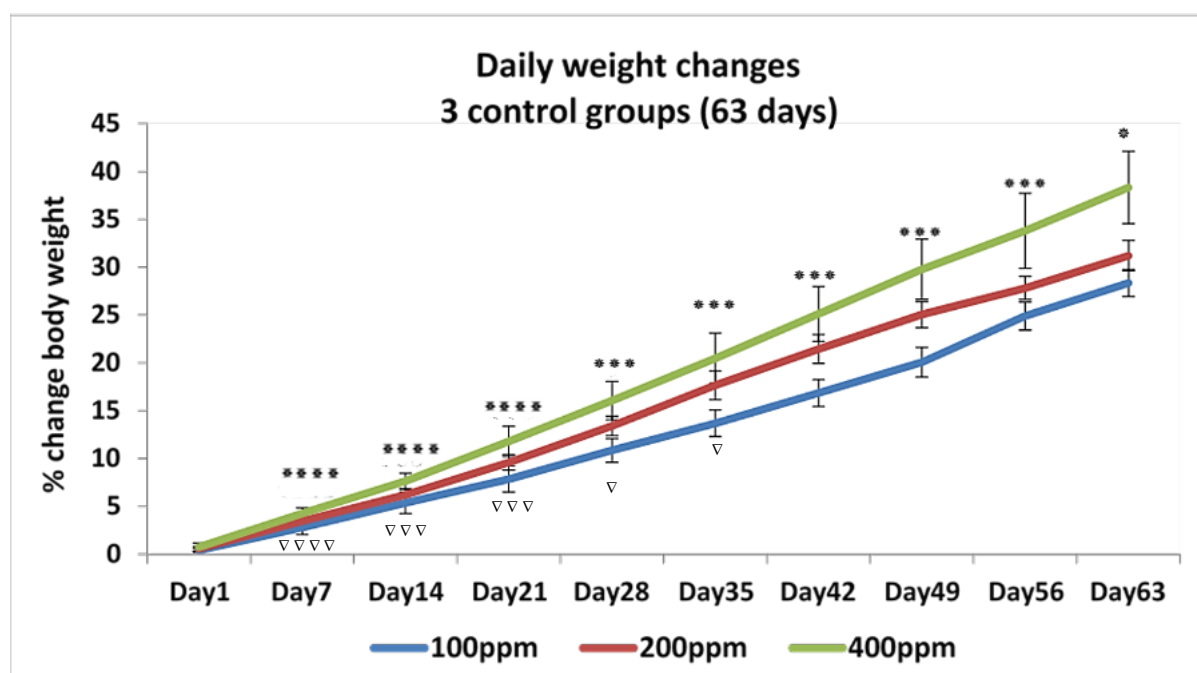

# Long-term iron deficiency and dietary iron excess exacerbate acute dextran sodium sulphate-induced colitis and are associated with significant dysbiosis

Mahalhal A, Burkitt MD, Duckworth CA, Hold GL, Campbell BJ, Pritchard DM and Probert CS

**Figure S3:** Masson's trichrome staining of the colonic tissues of (b) 100ppm iron; (c) 200ppm iron; (d) 400ppm iron mice with dextran sulphate sodium (DSS)-induced colitis at day-63, and 200ppm iron controls (a). Average fibrosis scores for all groups of DSS-treated mice on different iron diets. (e) Horizontal lines at the median. Data are presented as a mean  $\pm$  standard error of the mean. Differences were tested by Kruskal–Wallis test followed by multiple comparison Dunn's test. ( $p < 0.05$ ).

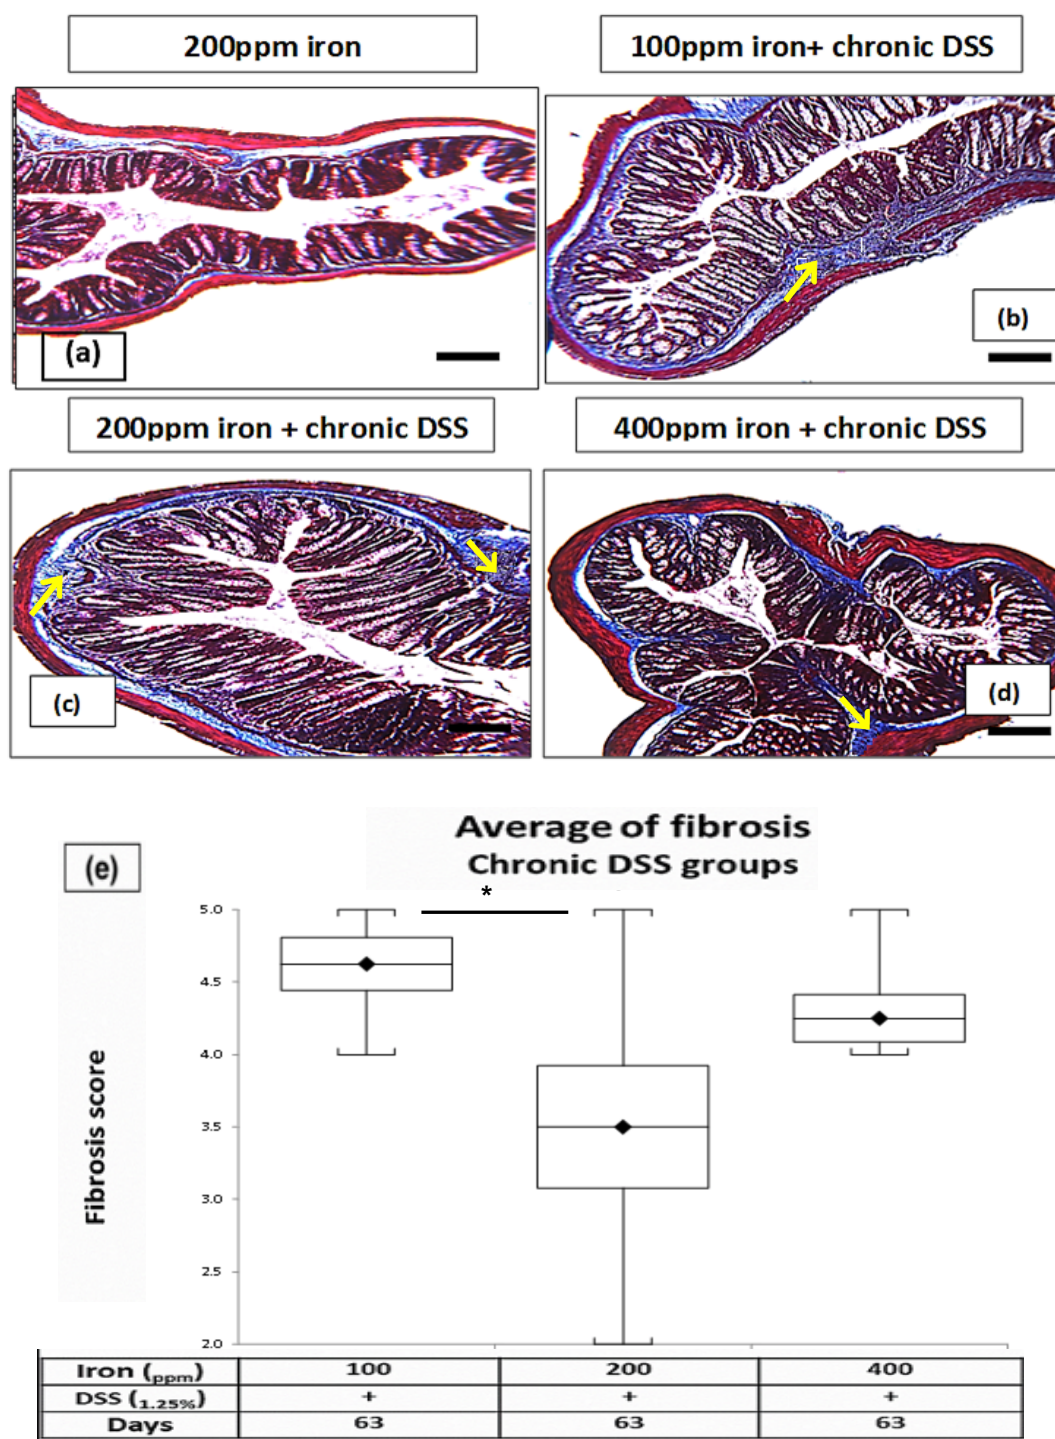

# Long-term iron deficiency and dietary iron excess exacerbate acute dextran sodium sulphate-induced colitis and are associated with significant dysbiosis

Mahalhal A, Burkitt MD, Duckworth CA, Hold GL, Campbell BJ, Pritchard DM and Probert CS

**Figure S4:** Faecal calprotectin concentrations in the presence or absence of DSS-induced colitis **(A)** chronic (day-1 vs. day-21, day-42 and day-63; n=8 for each group) or **(B)** acute colitis (day-1 vs. day-10; n=4 for each group), for mice consuming **(i)** a deficient iron (100ppm iron) diet, **(ii)** standard (200ppm) diet or **(iii)** supplemented (400ppm) iron chow diet. Data are presented as a mean  $\pm$  standard error of the mean (SEM). Differences were tested by Kruskal-Wallis test followed by multiple comparison Dunn's test; \*  $p < 0.05$  and \*\*  $p < 0.01$ .

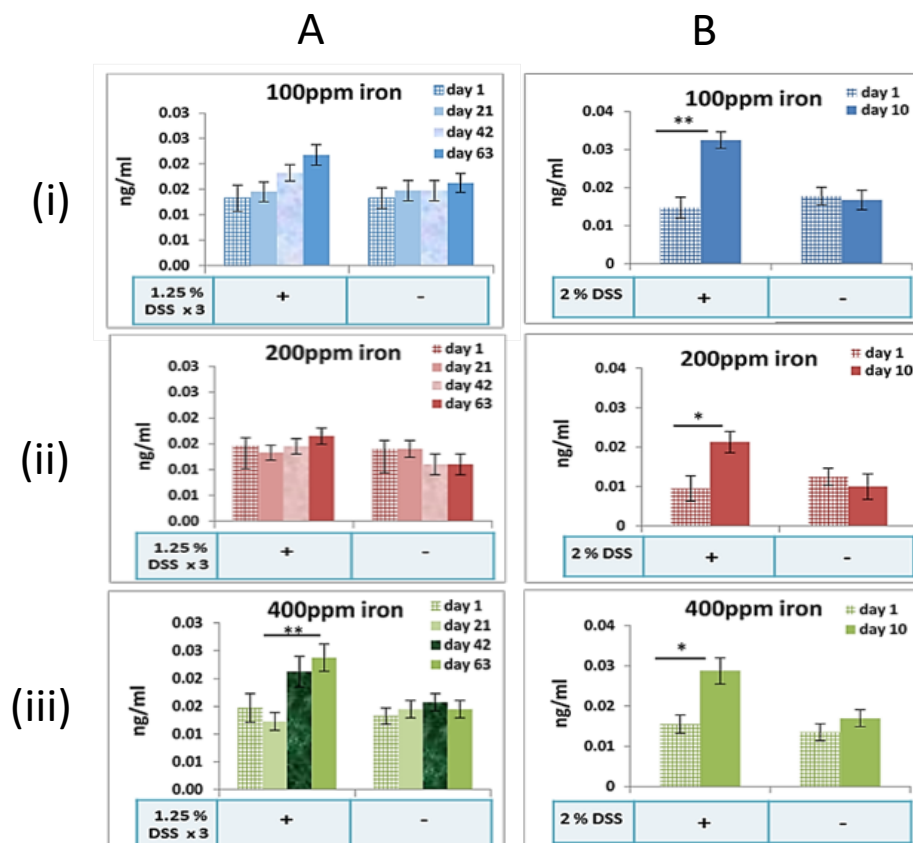

# Long-term iron deficiency and dietary iron excess exacerbate acute dextran sodium sulphate-induced colitis and are associated with significant dysbiosis

Mahalhal A, Burkitt MD, Duckworth CA, Hold GL, Campbell BJ, Pritchard DM and Probert CS

**Figure S5: Rarefaction curves of the observed number of species metric for all samples (> 500 reads).** The plot shows the average number of distinct OTUs found in sub-samples of increasing number of sequences. (A) Chao1 is a nonparametric estimator that predicts the minimum species richness of a sample. (B) The observed number of species is defined as the number of distinct OTUs within a sample. (C) The PD metric represents the minimum total branch length that covers all taxa within the sample on a phylogenetic tree.

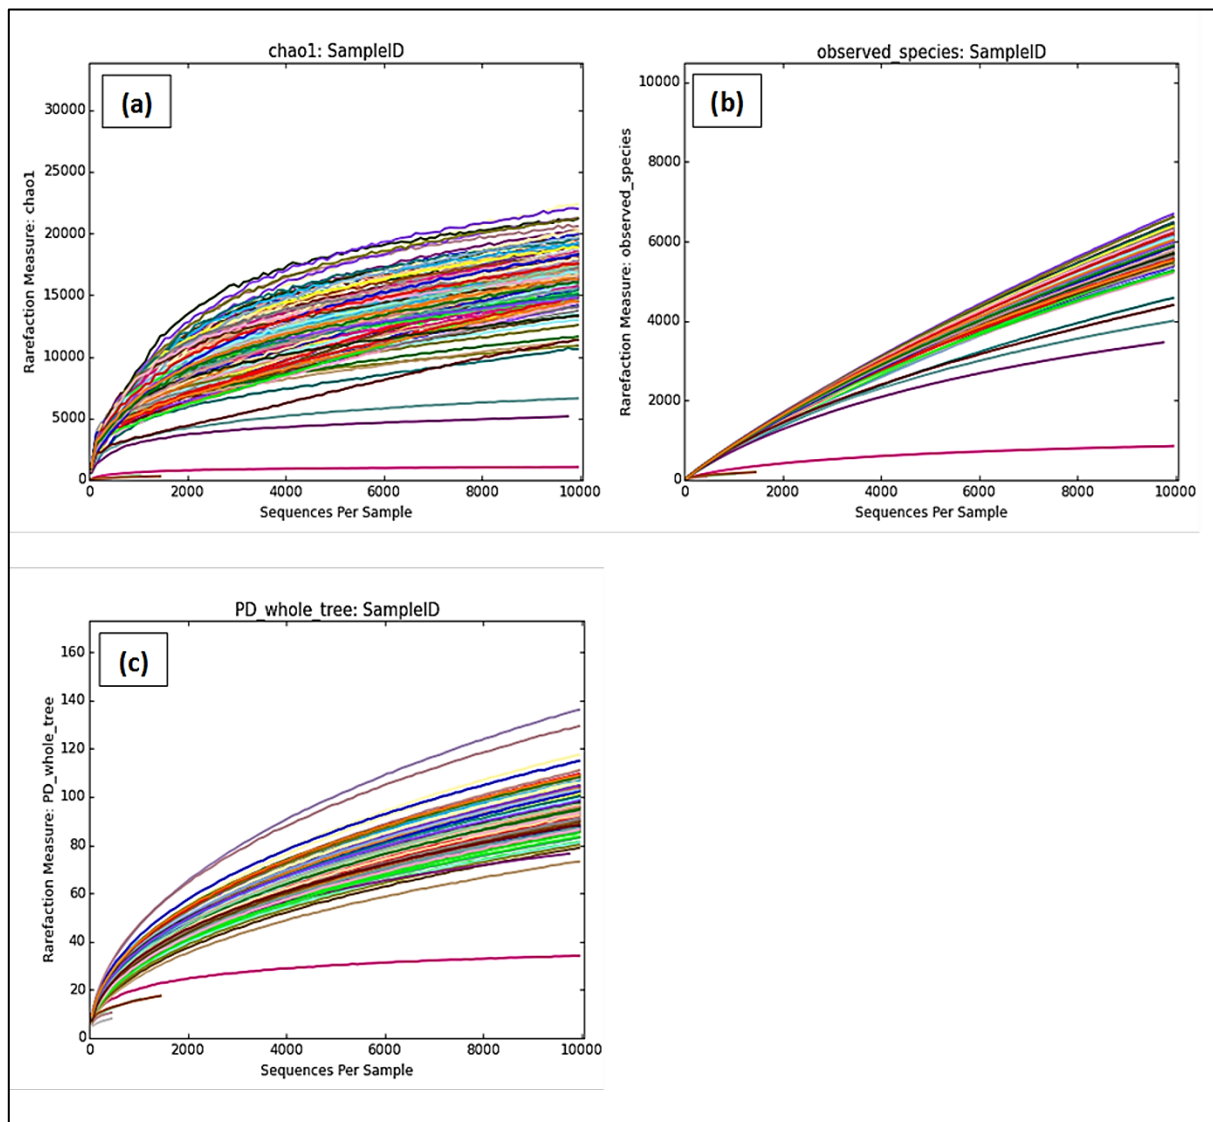

# Long-term iron deficiency and dietary iron excess exacerbate acute dextran sodium sulphate-induced colitis and are associated with significant dysbiosis

Mahalhal A, Burkitt MD, Duckworth CA, Hold GL, Campbell BJ, Pritchard DM and Probert CS

**Figure S6:** UPGMA (Unweighted Pair-Group Method with Arithmetic mean) trees.

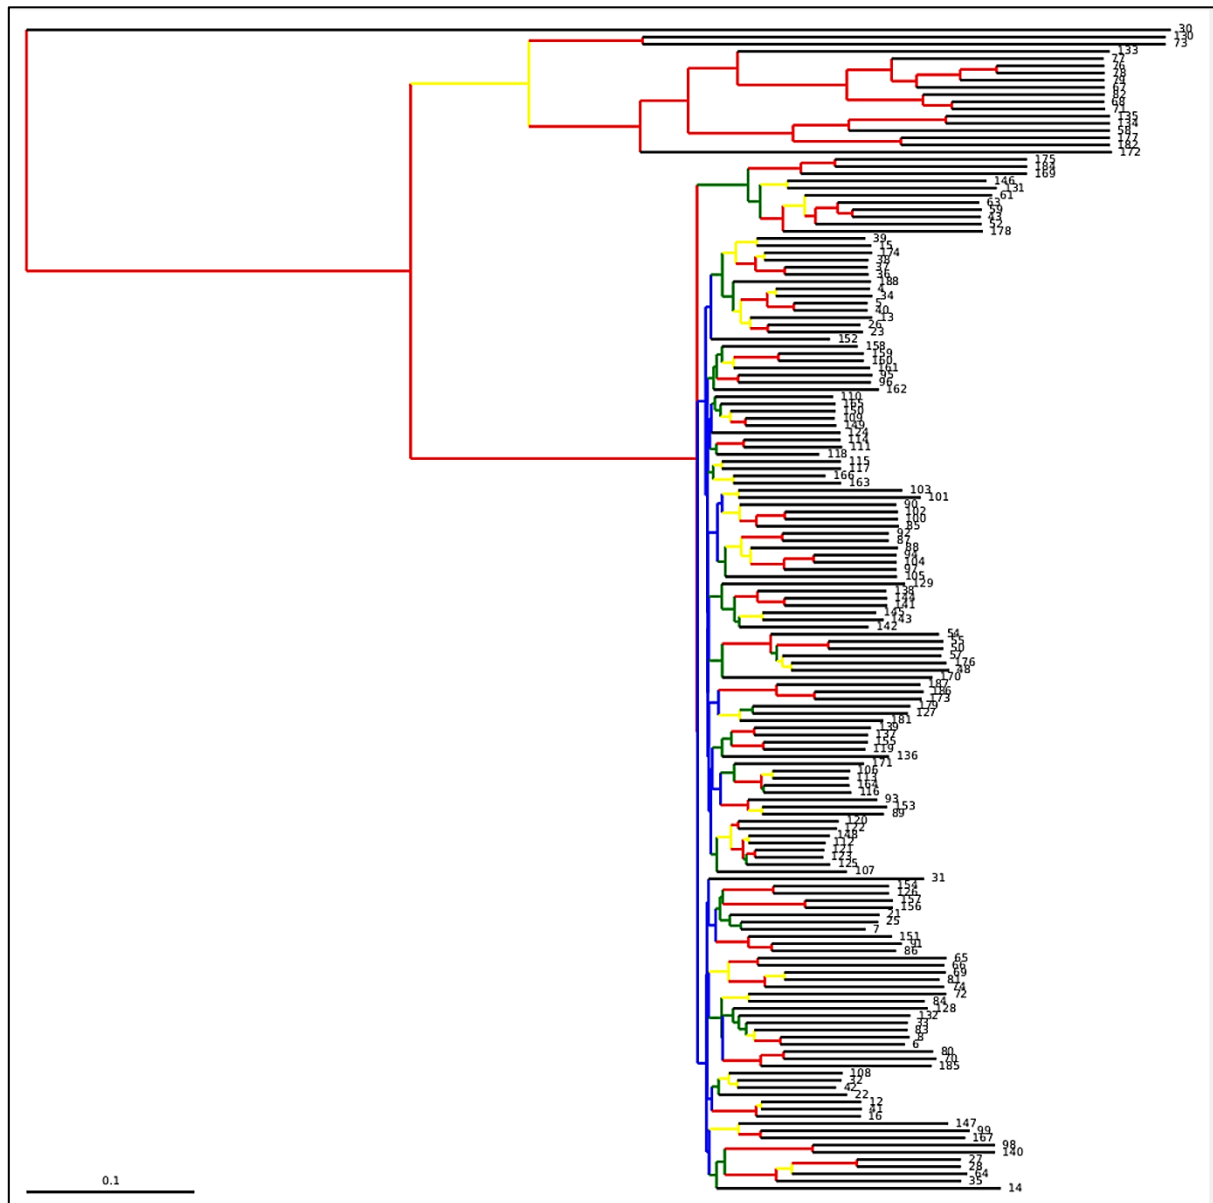

Supplement: Supplementary file 1 [file ijms-22-03646-s001.pdf]
